# Supplementary material for: Two chiral lanthanide PrIII and HoIII complexes: NIR luminescence and nonlinear optical properties
Source: Royal Society of Chemistry journal article supplement (doi:10.1039/d4ce00421c), 2024-01-01
Supplement: d4ce00421c1.pdf [file d4ce00421c1.pdf]

## Supporting information for

### Two chiral lanthanide Pr<sup>III</sup> and Ho<sup>III</sup> complexes: NIR luminescent and nonlinear optical properties

Yanhong Peng,<sup>a,b</sup> Taoyu Wang,<sup>\*a,b</sup> Congli Gao,<sup>c</sup> Fengcai Li<sup>c</sup> and Xi-Li Li<sup>\*c</sup>

<sup>a</sup>Guangdong Provincial Laboratory of Chemistry and Fine Chemical Engineering Jieyang Center, Jieyang 515200, China

<sup>b</sup>School of Advanced Manufacturing, Guangdong University of Technology, Jieyang 515200, China. E-mail: taoyuw@gdut.edu.cn

<sup>c</sup>Henan Provincial Key Laboratory of Surface and Interface Science, Zhengzhou University of Light Industry, Zhengzhou 450002, PR China. E-mail: lixl@zzuli.edu.cn

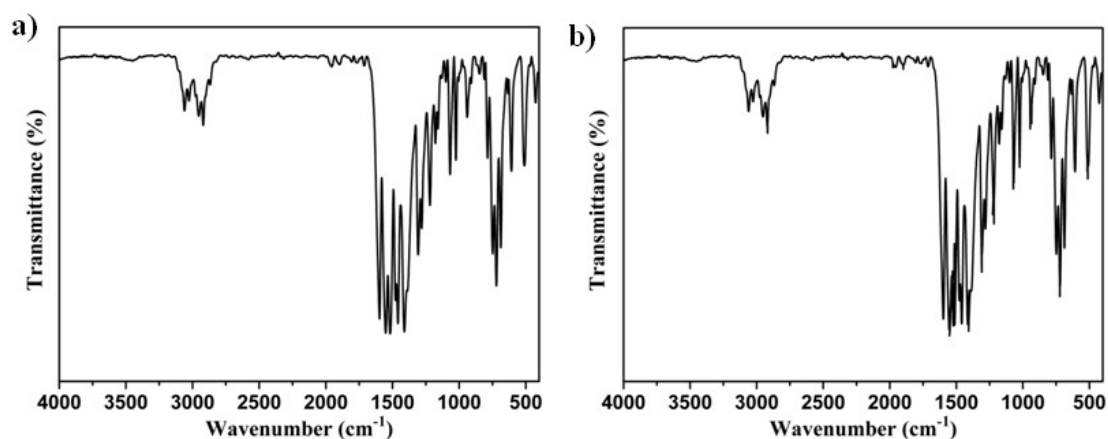

Fig. S1 FT-IR spectra of **1** (a) and **2** (b).

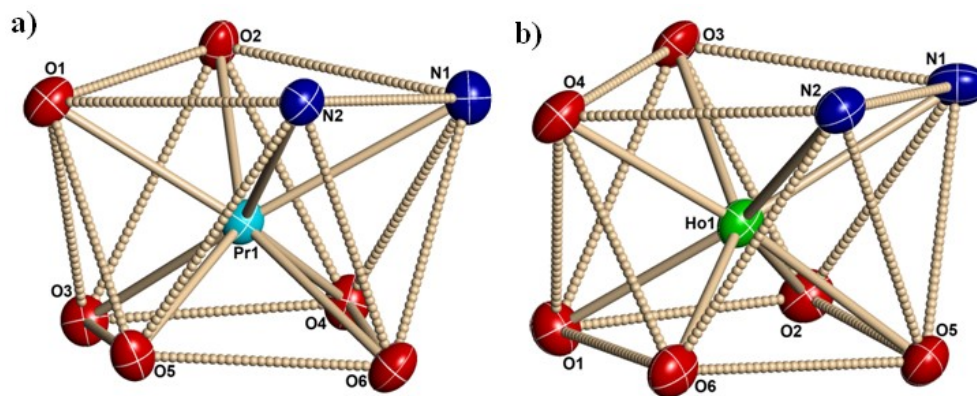

**Fig. S2** Coordination geometries of Pr<sup>III</sup> in **1** (a) and Ho<sup>III</sup> in **2** (b).

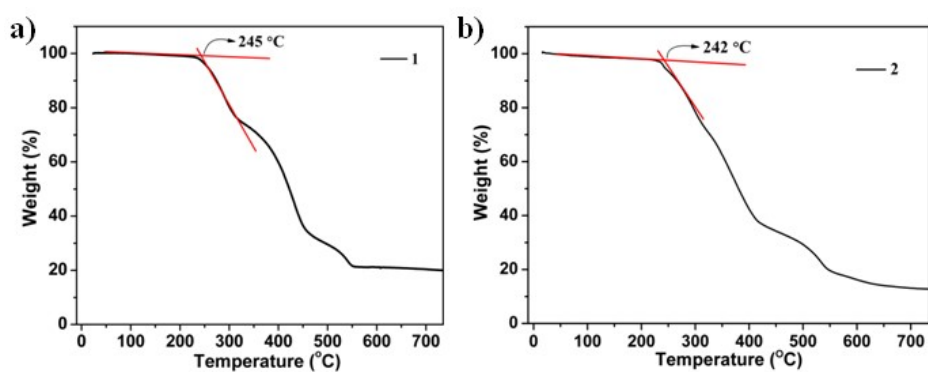

**Fig. S3** Thermogravimetric analyses of **1** (a) and **2** (b).

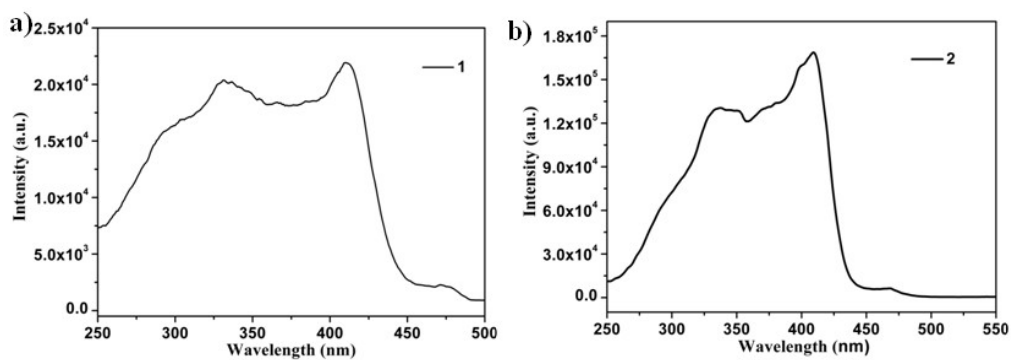

**Fig. S4** Excitation spectra of **1** (a) and **2** (b) obtained by monitoring their respective maximum emission wavelengths.

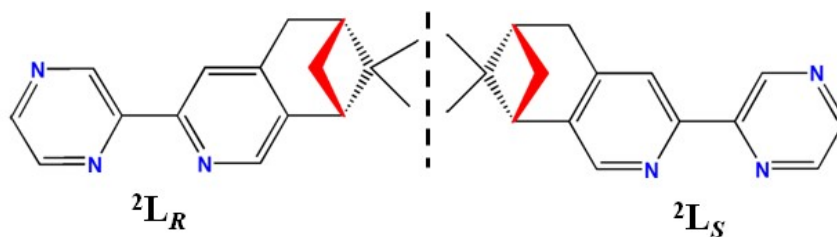

**Scheme S1** Chemical structures of enantiopure N<sup>N</sup>-donor ligands **2L<sub>R</sub>** and **2L<sub>S</sub>**.

**Table S1** Crystallographic data and structure refinement parameters for **1** and **2**.

| Complexes                                        | <b>1</b>                                                         | <b>2</b>                                                         |
|--------------------------------------------------|------------------------------------------------------------------|------------------------------------------------------------------|
| Chemical formula                                 | C <sub>62</sub> H <sub>51</sub> N <sub>2</sub> O <sub>6</sub> Pr | C <sub>62</sub> H <sub>51</sub> N <sub>2</sub> O <sub>6</sub> Ho |
| Formula weight                                   | 1060.95                                                          | 1084.97                                                          |
| Crystal system                                   | monoclinic                                                       | monoclinic                                                       |
| Space group                                      | <i>P</i> 2 <sub>1</sub>                                          | <i>P</i> 2 <sub>1</sub>                                          |
| <i>a</i> (Å)                                     | 9.5474(5)                                                        | 9.5036(4)                                                        |
| <i>b</i> (Å)                                     | 20.9047(10)                                                      | 20.7058(8)                                                       |
| <i>c</i> (Å)                                     | 12.6813(8)                                                       | 12.7856(9)                                                       |
| $\alpha$ (deg)                                   | 90                                                               | 90                                                               |
| $\beta$ (deg)                                    | 92.922(5)                                                        | 92.003(5)                                                        |
| $\gamma$ (deg)                                   | 90                                                               | 90                                                               |
| <i>V</i> (Å <sup>3</sup> )                       | 2527.7(2)                                                        | 2514.4(2)                                                        |
| <i>Z</i>                                         | 2                                                                | 2                                                                |
| <i>D</i> <sub>c</sub> (g cm <sup>-3</sup> )      | 1.394                                                            | 1.433                                                            |
| $\mu$ (mm <sup>-1</sup> )                        | 1.019                                                            | 1.629                                                            |
| F(000)                                           | 1088                                                             | 1104                                                             |
| Reflections collected                            | 9016                                                             | 9303                                                             |
| Independent reflections                          | 6656                                                             | 6462                                                             |
| Data/restraints/parameters                       | 6656/1/642                                                       | 6462/1/642                                                       |
| GOF                                              | 0.894                                                            | 1.024                                                            |
| $R_1$ [ <i>I</i> ≥ 2σ( <i>I</i> )] <sup>a</sup>  | 0.0284                                                           | 0.0288                                                           |
| $wR_2$ [ <i>I</i> ≥ 2σ( <i>I</i> )] <sup>b</sup> | 0.0312                                                           | 0.0432                                                           |
| Flack parameter                                  | 0.001(9)                                                         | 0.002(8)                                                         |
| CCDC                                             | 2351265                                                          | 2351267                                                          |

$$^aR_1 = \sum ||F_o| - |F_c|| / \sum |F_o|, \quad ^b wR_2 = [\sum w(F_o^2 - F_c^2)^2 / \sum w(F_o^2)^2]^{1/2}$$

**Table S2** Selected bond lengths (Å) and angles (°) for **1** and **2**.

| Bond lengths for <b>1</b> |           |                 |            |                 |            |
|---------------------------|-----------|-----------------|------------|-----------------|------------|
| Pr(1)—O(1)                | 2.413(4)  | Pr(1)—O(2)      | 2.430(5)   | Pr(1)—O(3)      | 2.402(3)   |
| Pr(1)—O(4)                | 2.416(2)  | Pr(1)—O(5)      | 2.395(4)   | Pr(1)—O(6)      | 2.418(5)   |
| Pr(1)—N(1)                | 2.672(3)  | Pr(1)—N(2)      | 2.659(3)   |                 |            |
| Bond lengths for <b>2</b> |           |                 |            |                 |            |
| Ho(1)—O(1)                | 2.306(4)  | Ho(1)—O(2)      | 2.317(3)   | Ho(1)—O(3)      | 2.327(6)   |
| Ho(1)—O(4)                | 2.322(5)  | Ho(1)—O(5)      | 2.333(6)   | Ho(1)—O(6)      | 2.296(5)   |
| Ho(1)—N(1)                | 2.563(4)  | Ho(1)—N(2)      | 2.539(4)   |                 |            |
| Bond angles for <b>1</b>  |           |                 |            |                 |            |
| O(3)-Pr(1)-O(2)           | 81.86(13) | O(3)-Pr(1)-O(5) | 80.27(11)  | O(6)-Pr(1)-O(5) | 69.40(18)  |
| O(1)-Pr(1)-O(3)           | 77.36(11) | O(6)-Pr(1)-N(1) | 72.4(2)    | O(3)-Pr(1)-N(2) | 149.80(11) |
| Bond angles for <b>2</b>  |           |                 |            |                 |            |
| O(3)-Ho(1)-O(2)           | 76.9(3)   | O(3)-Ho(1)-O(5) | 142.17(12) | O(6)-Ho(1)-O(5) | 72.2(2)    |
| O(1)-Ho(1)-O(3)           | 83.03(18) | O(6)-Ho(1)-N(1) | 132.4(2)   | O(3)-Ho(1)-N(2) | 104.75(17) |

**Table S3** Continuous shape measures calculation for Pr1 in **1**.

|          |             |                                            |
|----------|-------------|--------------------------------------------|
| OP-8     | 1 $D_{8h}$  | Octagon                                    |
| HPY-8    | 2 $C_{7v}$  | Heptagonal pyramid                         |
| HBPY-8   | 3 $D_{6h}$  | Hexagonal bipyramid                        |
| CU-8     | 4 $O_h$     | Cube                                       |
| SAPR-8   | 5 $D_{4d}$  | Square antiprism                           |
| TDD-8    | 6 $D_{2d}$  | Triangular dodecahedron                    |
| JGBF-8   | 7 $D_{2d}$  | Johnson gyrobifastigium J26                |
| JETBPY-8 | 8 $D_{3h}$  | Johnson elongated triangular bipyramid J14 |
| JBTPR-8  | 9 $C_{2v}$  | Biaugmented trigonal prism J50             |
| BTPR-8   | 10 $C_{2v}$ | Biaugmented trigonal prism                 |
| JSD-8    | 11 $D_{2d}$ | Snub diphenoïd J84                         |
| TT-8     | 12 $T_d$    | Triakis tetrahedron                        |
| ETBPY-8  | 13 $D_{3h}$ | Elongated trigonal bipyrami                |

| Structure [ML8] | OP-8   | HPY-8  | HBPY-8 | CU-8   | SAPR-8       | TDD-8 | JGBF-8 | JETBPY-8 | JBTPR-8 | BTPR-8 | JSD-8 | TT-8   | ETBPY-8 |
|-----------------|--------|--------|--------|--------|--------------|-------|--------|----------|---------|--------|-------|--------|---------|
| ABOXIY          | 29.146 | 22.002 | 17.063 | 10.401 | <b>0.886</b> | 1.808 | 15.043 | 27.024   | 2.519   | 1.932  | 4.464 | 11.007 | 22.568  |

**Table S4** Continuous shape measures calculation for Ho1 in **2**.

|          |             |                                            |
|----------|-------------|--------------------------------------------|
| OP-8     | 1 $D_{8h}$  | Octagon                                    |
| HPY-8    | 2 $C_{7v}$  | Heptagonal pyramid                         |
| HBPY-8   | 3 $D_{6h}$  | Hexagonal bipyramid                        |
| CU-8     | 4 $O_h$     | Cube                                       |
| SAPR-8   | 5 $D_{4d}$  | Square antiprism                           |
| TDD-8    | 6 $D_{2d}$  | Triangular dodecahedron                    |
| JGBF-8   | 7 $D_{2d}$  | Johnson gyrobifastigium J26                |
| JETBPY-8 | 8 $D_{3h}$  | Johnson elongated triangular bipyramid J14 |
| JBTPR-8  | 9 $C_{2v}$  | Biaugmented trigonal prism J50             |
| BTPR-8   | 10 $C_{2v}$ | Biaugmented trigonal prism                 |
| JSD-8    | 11 $D_{2d}$ | Snub diphenoïd J84                         |
| TT-8     | 12 $T_d$    | Triakis tetrahedron                        |
| ETBPY-8  | 13 $D_{3h}$ | Elongated trigonal bipyrami                |

| Structure [ML8] | OP-8   | HPY-8  | HBPY-8 | CU-8   | SAPR-8       | TDD-8 | JGBF-8 | JETBPY-8 | JBTPR-8 | BTPR-8 | JSD-8 | TT-8   | ETBPY-8 |
|-----------------|--------|--------|--------|--------|--------------|-------|--------|----------|---------|--------|-------|--------|---------|
| ABOXIY          | 28.890 | 22.740 | 16.662 | 10.020 | <b>0.570</b> | 1.720 | 15.558 | 27.743   | 2.289   | 1.772  | 4.414 | 10.751 | 23.319  |
